# Supplementary material for: Comparative metabolomics profiling of isogenic KRAS wild type and mutant NSCLC cells in vitro and in vivo
Source: PubMed Central journal article supplement (PMC4916601; doi:10.1038/srep28398), 2016-06-22
Supplement: srep28398-s1.pdf [file srep28398-s1.pdf]

## **Comparative metabolomics profiling of isogenic KRAS wild type and mutant NSCLC cells in vitro and in vivo**

Laura Brunelli<sup>1\*#</sup>, Elisa Caiola<sup>2\*#</sup>, Mirko Marabese<sup>2</sup>, Massimo Broggin<sup>2</sup>, Roberta Pastorelli<sup>1</sup>

<sup>1</sup>Protein and Gene Biomarkers Unit, Laboratory of Mass Spectrometry, Department of Environmental Health Sciences, IRCCS-Istituto di Ricerche Farmacologiche “Mario Negri”, Milan, Italy.

<sup>2</sup>Laboratory of Molecular Pharmacology, Department of Oncology, IRCCS-Istituto di Ricerche Farmacologiche “Mario Negri”, Milan, Italy

# These authors contributed equally to this work

\*Corresponding authors: Laura Brunelli (laura.brunelli@marionegri.it) and Elisa Caiola (elisa.caiola@marionegri.it)

### **SUPPLEMENTARY INFORMATION**

- Supplementary Methods
- Supplementary Figure S1: Tumor growth of G12C KRAS or WT KRAS cells in immunodeficient mice.
- Supplementary Table S1: Concentrations (uM) of all the metabolites measured in cell systems.
- Supplementary Table S2: Concentrations (uM) of all the metabolites measured in the xenograft model.
- Supplementary Table S3: Deregulated metabolites and their concentrations in cell systems.
- Supplementary Table S4: Deregulated metabolites and their concentrations in the xenograft model.
- Supplementary Table S5: List of the measurable metabolites using the Biocrates Absolute IDQ p180 kit.

## **Supplementary Methods**

### **Absolute Metabolite profiling**

Targeted metabolomics analysis of WT KRAS and G12C KRAS isoforms in NSCLC isogenic cell lines and their correspondent xenograft tumor samples was performed using the Biocrates AbsoluteIDQ™ p180 kit (Biocrates Life Science AG, Innsbruck, Austria). This validated targeted assay allows for simultaneous detection and quantification of metabolites in biological samples in a high-throughput manner. The metabolite extracts were processed following the instructions by the manufacturer and analyzed on a triple-quadrupole mass spectrometer (AB SCIEX triple-quad 5500) operating in the multiple reaction monitoring (MRM-MS) mode. The assay is based on PITC (phenylisothiocyanate)-derivatization in the presence of internal standards for the analysis of aminoacids and biogenic amines resolved and quantified by liquid chromatography- tandem mass spectrometry (LC-MS/MS) using scheduled MRMs. Subsequent flow injection analysis tandem mass spectrometry (FIA-MS/MS) was performed to analyze acylcarnitines, glycerophospholipids, hexose. MRM detection was used for quantification applying spectra parsing algorithm integrated into the MetIQ software (Biocrates Life Science AG, Innsbruck, Austria). Concentrations were calculated and evaluated by comparing measured analytes in a defined extracted ion count section to those of specific labeled internal standards or non-labeled ones, provided by the kit. Metabolite concentration were normalized based on cell numbers and tumor weight using cell normalization and tissue factor tools implemented into MetIDQ-boron software (Biocrates). The measurements are made in a 96-well format. Seven calibration standards, five quality control samples, three zero samples (methanol) and one blank (solvents) are integrated into the plate. The limit of detection for the individual metabolites is set three times the value of the “zero samples”. The average coefficient of variation of the metabolites among the biological replicates was 30%. This variation is the sum of biological and technical variation. Based on the five quality controls (QCs) included in the mass spectrometric analysis to monitor the instrumental performances and evaluate the quality of the

data, the CV was below 15% (technical variation). For glycerophospholipids, the precise position of the double bonds and the distribution of the carbon atoms in different fatty acid side chains cannot be determined with this technology. Lipid side-chain composition is abbreviated as C<sub>x</sub>:y, where x denotes the number of carbons in the side chain and y the number of double bonds. The nature of fatty acids linkage is expressed as aa for diacyl or ae for acyl-alkyl. For example, PCaaC32:1 denotes diacyl-phosphatidylcholine with 32 carbons in the two fatty acids side chains and a single double bond in one of them. The list of all the measurable metabolites is provided in **supplementary table S5**.

**Supplementary Figure 1. Tumor growth of G12C KRAS or WT KRAS cells in immunodeficient mice.** Mice were inoculated subcutaneously with 200 uL of cell suspension containing  $5 \times 10^6$  WT or G12C KRAS cells. The growing tumor masses were measured with a Vernier caliper, and the tumor weights ( $1\text{mm}^3 = 1\text{mg}$ ) were calculated with the formula: length x (width)<sup>2</sup>/2. The tumor weight on day n was expressed as relative tumor weight (RTW) according to the following formula:  $\text{RTW} = \text{TW}_n/\text{TW}_0$ , where  $\text{TW}_n$  is the tumor volume on day n and  $\text{TW}_0$  is the volume on the day of the first measurement.

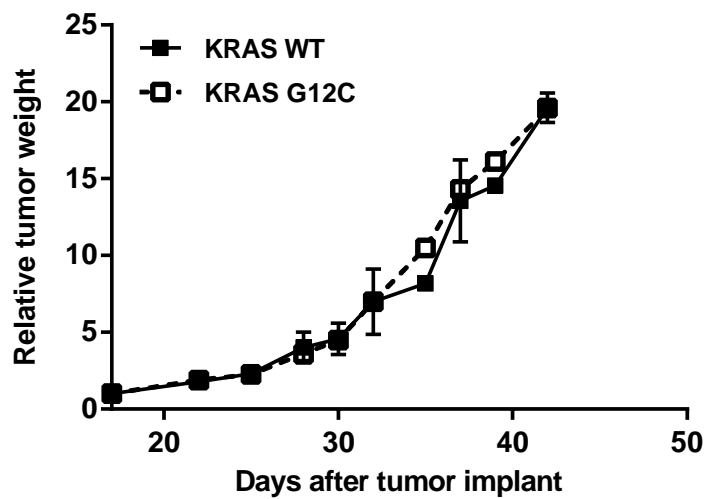

**Supplementary Table S1.** Micromolar concentrations of quantified metabolites in the monolayer cell system harboring G12C or WT KRAS isoforms. R# number of biological replicates

| Metabolite     | WT      |         |         |         |         |         |         |         |         | G12C    |         |         |         |         |         |         |         |         |
|----------------|---------|---------|---------|---------|---------|---------|---------|---------|---------|---------|---------|---------|---------|---------|---------|---------|---------|---------|
|                | R1      | R2      | R3      | R4      | R5      | R6      | R7      | R8      | R9      | R1      | R2      | R3      | R4      | R5      | R6      | R7      | R8      | R9      |
| lysoPC a C16:0 | 5.00    | 7.13    | 4.87    | 5.90    | 7.22    | 5.71    | 2.85    | 7.00    | 10.58   | 10.04   | 9.71    | 11.04   | 11.33   | 8.36    | 10.84   | 7.96    | 6.92    | 6.78    |
| lysoPC a C16:1 | 0.95    | 1.22    | 0.90    | 0.81    | 1.11    | 0.96    | 0.54    | 1.24    | 1.87    | 1.71    | 1.38    | 1.16    | 1.71    | 1.35    | 1.72    | 2.21    | 1.68    | 1.68    |
| lysoPC a C17:0 | 0.34    | 0.43    | 0.28    | 0.37    | 0.43    | 0.38    | 0.19    | 0.36    | 0.49    | 0.64    | 0.63    | 0.94    | 0.72    | 0.56    | 0.70    | 0.48    | 0.45    | 0.41    |
| lysoPC a C18:0 | 2.09    | 2.88    | 2.05    | 2.07    | 2.72    | 2.45    | 0.93    | 1.78    | 2.88    | 4.47    | 4.07    | 9.90    | 3.51    | 3.70    | 4.10    | 1.96    | 1.70    | 1.61    |
| lysoPC a C18:1 | 4.98    | 7.50    | 5.52    | 4.75    | 6.78    | 5.34    | 3.09    | 6.58    | 10.09   | 8.38    | 6.86    | 6.76    | 7.67    | 6.13    | 8.06    | 7.52    | 6.50    | 6.62    |
| lysoPC a C18:2 | 0.36    | 0.44    | 0.35    | 0.32    | 0.44    | 0.34    | 0.23    | 0.39    | 0.49    | 0.57    | 0.42    | 0.54    | 0.48    | 0.47    | 0.51    | 0.60    | 0.47    | 0.48    |
| lysoPC a C20:3 | 0.21    | 0.27    | 0.22    | 0.17    | 0.27    | 0.20    | 0.11    | 0.22    | 0.28    | 0.41    | 0.28    | 0.49    | 0.30    | 0.26    | 0.34    | 0.34    | 0.28    | 0.31    |
| lysoPC a C20:4 | 0.17    | 0.40    | 0.34    | 0.19    | 0.36    | 0.23    | 0.09    | 0.28    | 0.38    | 0.57    | 0.38    | 0.60    | 0.31    | 0.23    | 0.37    | 0.36    | 0.20    | 0.25    |
| lysoPC a C24:0 | 0.21    | 0.25    | 0.23    | 0.12    | 0.22    | 0.17    | 0.12    | 0.13    | 0.22    | 0.31    | 0.22    | 0.23    | 0.28    | 0.28    | 0.31    | 0.32    | 0.16    | 0.20    |
| lysoPC a C26:0 | 0.61    | 0.61    | 0.67    | 0.26    | 0.60    | 0.41    | 0.52    | 0.36    | 0.53    | 0.96    | 0.69    | 0.57    | 0.67    | 0.75    | 0.93    | 1.00    | 0.46    | 0.55    |
| lysoPC a C26:1 | 0.30    | 0.38    | 0.31    | 0.17    | 0.31    | 0.23    | 0.16    | 0.21    | 0.33    | 0.49    | 0.36    | 0.40    | 0.40    | 0.41    | 0.47    | 0.43    | 0.33    | 0.39    |
| lysoPC a C28:0 | 0.72    | 1.01    | 0.75    | 0.46    | 0.89    | 0.75    | 0.50    | 0.52    | 0.95    | 1.35    | 1.03    | 0.91    | 0.87    | 1.17    | 1.26    | 1.35    | 1.15    | 1.19    |
| lysoPC a C28:1 | 0.58    | 0.74    | 0.62    | 0.31    | 0.64    | 0.52    | 0.29    | 0.38    | 0.60    | 0.91    | 0.75    | 0.61    | 0.74    | 0.77    | 0.93    | 0.83    | 0.68    | 0.74    |
| PC aa C24:0    | 0.25    | 0.26    | 0.29    | 0.12    | 0.23    | 0.19    | 0.17    | 0.13    | 0.16    | 0.25    | 0.16    | 0.14    | 0.19    | 0.16    | 0.25    | 0.32    | 0.12    | 0.15    |
| PC aa C28:1    | 2.00    | 2.61    | 2.26    | 1.05    | 2.08    | 1.98    | 1.01    | 1.35    | 2.01    | 2.38    | 1.86    | 1.38    | 1.68    | 1.76    | 2.39    | 1.86    | 1.75    | 1.81    |
| PC aa C30:0    | 11.17   | 15.50   | 8.42    | 6.06    | 11.49   | 11.75   | 6.18    | 9.54    | 14.23   | 13.07   | 11.35   | 9.23    | 8.57    | 9.72    | 11.38   | 9.39    | 10.43   | 11.52   |
| PC aa C30:2    | 0.46    | 0.57    | 0.32    | 0.30    | 0.51    | 0.54    | 0.29    | 0.40    | 0.55    | 0.77    | 0.70    | 0.50    | 0.78    | 0.78    | 0.76    | 0.74    | 0.87    | 0.93    |
| PC aa C32:0    | 134.84  | 181.53  | 105.09  | 51.56   | 105.07  | 115.46  | 66.88   | 111.75  | 129.60  | 124.10  | 104.89  | 77.96   | 61.02   | 78.78   | 89.70   | 68.81   | 71.06   | 77.84   |
| PC aa C32:1    | 1212.67 | 1729.86 | 1037.92 | 527.04  | 1188.41 | 1274.96 | 634.76  | 1218.41 | 1597.02 | 1178.40 | 1058.83 | 796.41  | 772.73  | 941.13  | 1073.20 | 779.58  | 914.56  | 974.06  |
| PC aa C32:2    | 157.59  | 226.03  | 139.44  | 83.52   | 162.73  | 172.21  | 88.29   | 185.96  | 238.64  | 168.34  | 155.29  | 103.00  | 134.90  | 161.09  | 172.85  | 151.78  | 197.92  | 192.06  |
| PC aa C32:3    | 8.26    | 11.99   | 7.11    | 4.88    | 9.01    | 9.36    | 3.62    | 7.59    | 10.18   | 9.44    | 7.92    | 5.87    | 7.27    | 8.79    | 9.60    | 5.99    | 7.68    | 8.03    |
| PC aa C34:1    | 2590.89 | 3280.84 | 1991.96 | 1041.31 | 2257.43 | 2346.00 | 1182.90 | 2162.59 | 2811.60 | 1732.02 | 1472.37 | 1410.90 | 1106.49 | 1380.30 | 1531.45 | 1074.04 | 1203.25 | 1255.24 |
| PC aa C34:2    | 895.25  | 1357.15 | 760.92  | 387.52  | 842.86  | 932.75  | 454.38  | 950.86  | 1286.91 | 866.89  | 792.54  | 595.05  | 576.36  | 711.37  | 757.13  | 643.82  | 768.84  | 813.88  |
| PC aa C34:3    | 56.51   | 82.74   | 48.50   | 27.41   | 57.55   | 60.19   | 25.52   | 56.90   | 78.19   | 67.35   | 59.43   | 45.31   | 47.31   | 55.38   | 62.72   | 43.79   | 57.78   | 57.67   |
| PC aa C34:4    | 10.00   | 13.90   | 8.69    | 6.00    | 11.15   | 11.99   | 4.37    | 10.20   | 12.55   | 12.16   | 11.17   | 7.47    | 9.14    | 10.82   | 11.93   | 7.54    | 9.65    | 9.74    |

|             |         |         |         |        |         |         |        |         |         |        |        |        |        |        |        |        |        |        |
|-------------|---------|---------|---------|--------|---------|---------|--------|---------|---------|--------|--------|--------|--------|--------|--------|--------|--------|--------|
| PC aa C36:0 | 12.73   | 21.06   | 10.86   | 5.10   | 12.81   | 15.57   | 5.65   | 10.83   | 16.56   | 13.23  | 12.44  | 9.54   | 7.70   | 10.66  | 11.00  | 7.59   | 8.68   | 8.45   |
| PC aa C36:1 | 167.44  | 257.67  | 140.54  | 67.90  | 134.00  | 159.41  | 60.50  | 112.83  | 134.68  | 148.39 | 111.26 | 112.14 | 72.19  | 85.96  | 104.63 | 56.88  | 57.96  | 73.24  |
| PC aa C36:2 | 1293.36 | 1961.16 | 1104.45 | 498.09 | 1104.33 | 1265.52 | 598.87 | 1077.50 | 1684.75 | 992.03 | 860.27 | 722.50 | 539.59 | 703.18 | 774.72 | 574.99 | 683.49 | 729.15 |
| PC aa C36:3 | 189.48  | 297.10  | 158.58  | 78.45  | 178.66  | 194.90  | 77.14  | 164.84  | 233.97  | 202.95 | 167.66 | 139.76 | 112.51 | 140.33 | 151.77 | 102.36 | 124.23 | 128.94 |
| PC aa C36:4 | 78.45   | 119.80  | 66.80   | 36.57  | 84.39   | 93.65   | 30.21  | 61.05   | 85.00   | 100.40 | 89.32  | 68.71  | 57.13  | 73.62  | 79.76  | 42.42  | 52.17  | 53.83  |
| PC aa C36:5 | 31.85   | 48.07   | 28.40   | 17.20  | 37.40   | 39.73   | 12.97  | 26.92   | 34.99   | 46.44  | 40.57  | 30.84  | 28.55  | 35.15  | 38.13  | 19.67  | 24.48  | 24.36  |
| PC aa C36:6 | 16.59   | 25.19   | 13.29   | 7.11   | 15.82   | 17.94   | 5.87   | 13.98   | 19.68   | 15.47  | 12.42  | 10.28  | 9.25   | 11.36  | 12.87  | 8.01   | 9.65   | 9.89   |
| PC aa C38:0 | 8.68    | 14.57   | 7.70    | 3.69   | 8.74    | 8.95    | 2.95   | 6.09    | 8.79    | 10.99  | 8.78   | 8.16   | 5.70   | 7.81   | 8.20   | 5.89   | 6.76   | 7.15   |
| PC aa C38:3 | 25.57   | 40.02   | 20.63   | 10.30  | 22.57   | 23.95   | 9.89   | 17.17   | 25.96   | 28.18  | 21.83  | 21.36  | 14.09  | 18.05  | 20.52  | 12.92  | 13.53  | 14.57  |
| PC aa C38:4 | 42.03   | 67.97   | 33.98   | 17.42  | 40.71   | 44.16   | 13.35  | 26.54   | 38.41   | 53.37  | 43.73  | 38.13  | 26.68  | 36.13  | 37.84  | 21.66  | 24.97  | 25.73  |
| PC aa C38:5 | 59.10   | 90.63   | 52.75   | 28.41  | 62.80   | 67.88   | 23.16  | 41.49   | 61.56   | 71.35  | 58.60  | 51.21  | 41.07  | 51.91  | 53.16  | 30.77  | 35.90  | 37.03  |
| PC aa C38:6 | 53.70   | 78.61   | 43.87   | 25.41  | 55.88   | 60.12   | 17.40  | 34.88   | 50.31   | 61.22  | 53.75  | 42.37  | 34.61  | 44.49  | 48.15  | 25.17  | 28.96  | 31.77  |
| PC aa C40:2 | 2.66    | 4.34    | 2.36    | 1.16   | 2.26    | 2.64    | 1.64   | 2.63    | 3.40    | 2.35   | 2.31   | 2.09   | 1.58   | 2.21   | 2.28   | 1.77   | 1.50   | 2.33   |
| PC aa C40:3 | 2.35    | 3.63    | 1.97    | 0.84   | 1.89    | 2.13    | 1.13   | 1.97    | 2.38    | 2.29   | 1.75   | 2.11   | 1.28   | 1.72   | 1.79   | 1.38   | 1.21   | 1.58   |
| PC aa C40:4 | 3.47    | 6.34    | 3.51    | 1.92   | 4.17    | 3.87    | 1.62   | 2.78    | 3.66    | 4.23   | 3.40   | 3.36   | 2.31   | 3.05   | 3.30   | 2.01   | 2.20   | 2.50   |
| PC aa C40:5 | 14.42   | 22.47   | 11.32   | 6.37   | 14.02   | 15.65   | 5.38   | 9.22    | 14.23   | 14.81  | 12.09  | 11.49  | 8.30   | 9.95   | 10.64  | 5.90   | 6.51   | 7.59   |
| PC aa C40:6 | 20.50   | 33.22   | 19.83   | 10.00  | 21.87   | 23.10   | 7.20   | 14.01   | 21.30   | 26.81  | 22.54  | 19.08  | 13.75  | 18.96  | 20.45  | 11.17  | 12.47  | 12.44  |
| PC aa C42:1 | 0.86    | 0.85    | 0.52    | 0.41   | 0.58    | 0.62    | 0.46   | 0.60    | 0.75    | 0.83   | 0.70   | 0.49   | 0.52   | 0.72   | 0.60   | 0.80   | 0.70   | 0.80   |
| PC aa C42:2 | 0.63    | 1.26    | 0.75    | 0.41   | 0.55    | 0.76    | 0.56   | 0.83    | 1.15    | 1.16   | 0.82   | 0.89   | 0.69   | 1.00   | 0.90   | 1.06   | 0.82   | 1.08   |
| PC aa C42:4 | 0.70    | 1.10    | 0.72    | 0.47   | 0.85    | 0.59    | 0.38   | 0.78    | 0.79    | 0.81   | 0.63   | 0.66   | 0.52   | 0.59   | 0.72   | 0.45   | 0.47   | 0.57   |
| PC aa C42:5 | 2.38    | 3.18    | 1.77    | 0.98   | 2.13    | 2.39    | 0.83   | 1.26    | 2.04    | 2.31   | 1.73   | 1.72   | 1.24   | 1.67   | 1.60   | 0.99   | 0.92   | 1.11   |
| PC aa C42:6 | 5.39    | 9.79    | 5.22    | 2.97   | 6.37    | 6.49    | 2.19   | 4.31    | 6.88    | 5.80   | 4.65   | 4.45   | 3.28   | 3.85   | 4.60   | 2.70   | 2.63   | 3.16   |
| PC ae C30:0 | 2.41    | 3.30    | 1.87    | 1.18   | 2.30    | 2.38    | 1.36   | 2.10    | 3.11    | 3.65   | 3.00   | 2.55   | 2.29   | 2.54   | 3.03   | 2.87   | 3.28   | 3.36   |
| PC ae C30:1 | 1.22    | 1.90    | 1.02    | 0.63   | 1.15    | 1.26    | 0.59   | 0.88    | 1.25    | 1.67   | 1.49   | 1.22   | 1.23   | 1.23   | 1.54   | 1.23   | 1.46   | 1.62   |
| PC ae C30:2 | 0.18    | 0.25    | 0.15    | 0.12   | 0.19    | 0.20    | 0.09   | 0.15    | 0.19    | 0.25   | 0.25   | 0.17   | 0.22   | 0.23   | 0.25   | 0.18   | 0.20   | 0.21   |
| PC ae C32:1 | 204.96  | 289.80  | 174.19  | 76.18  | 176.72  | 189.69  | 98.01  | 188.44  | 249.53  | 226.65 | 197.21 | 147.37 | 134.42 | 165.83 | 192.67 | 163.59 | 192.11 | 203.75 |
| PC ae C32:2 | 47.37   | 68.87   | 40.13   | 20.63  | 41.24   | 44.80   | 20.56  | 40.41   | 50.74   | 42.34  | 37.44  | 30.22  | 27.23  | 33.25  | 37.77  | 25.55  | 31.85  | 34.22  |
| PC ae C34:0 | 31.01   | 37.97   | 22.23   | 11.68  | 24.87   | 22.97   | 14.82  | 27.21   | 29.32   | 33.40  | 26.37  | 19.94  | 19.41  | 24.20  | 25.87  | 19.94  | 19.86  | 22.59  |
| PC ae C34:1 | 453.40  | 662.23  | 374.08  | 170.96 | 363.86  | 431.20  | 211.74 | 389.27  | 533.38  | 419.26 | 365.18 | 299.45 | 232.72 | 281.55 | 321.64 | 253.57 | 291.30 | 306.12 |
| PC ae C34:2 | 182.06  | 269.49  | 150.77  | 75.69  | 151.28  | 174.19  | 80.55  | 149.08  | 199.30  | 165.66 | 139.14 | 112.66 | 96.56  | 114.55 | 131.18 | 98.61  | 117.69 | 126.21 |

|             |         |         |         |         |         |         |         |         |         |         |         |         |         |         |         |         |         |         |
|-------------|---------|---------|---------|---------|---------|---------|---------|---------|---------|---------|---------|---------|---------|---------|---------|---------|---------|---------|
| PC ae C34:3 | 24.25   | 36.52   | 20.07   | 10.54   | 22.81   | 24.56   | 9.84    | 21.06   | 29.12   | 21.12   | 18.68   | 15.27   | 13.08   | 16.01   | 18.43   | 12.47   | 14.88   | 15.99   |
| PC ae C36:0 | 11.63   | 17.89   | 9.66    | 6.34    | 12.24   | 14.04   | 6.30    | 14.34   | 17.87   | 10.22   | 8.65    | 7.26    | 7.37    | 9.09    | 9.39    | 7.05    | 8.75    | 8.15    |
| PC ae C36:1 | 94.13   | 138.17  | 79.35   | 39.22   | 81.65   | 89.92   | 43.42   | 72.06   | 94.59   | 90.60   | 74.38   | 63.57   | 48.00   | 59.91   | 69.54   | 47.94   | 53.23   | 56.98   |
| PC ae C36:2 | 178.93  | 262.83  | 145.60  | 70.97   | 155.18  | 173.76  | 78.79   | 143.75  | 212.80  | 160.17  | 136.69  | 118.04  | 92.07   | 115.11  | 125.28  | 92.28   | 107.70  | 118.49  |
| PC ae C36:3 | 71.64   | 116.22  | 59.72   | 29.68   | 63.99   | 71.60   | 31.43   | 67.68   | 103.73  | 68.79   | 56.00   | 49.95   | 37.37   | 48.70   | 52.83   | 36.91   | 46.57   | 47.54   |
| PC ae C36:4 | 45.15   | 66.16   | 38.12   | 18.69   | 41.56   | 44.76   | 17.60   | 34.13   | 50.93   | 55.08   | 47.80   | 37.38   | 31.17   | 37.15   | 42.63   | 28.39   | 33.87   | 36.08   |
| PC ae C36:5 | 27.17   | 40.68   | 23.36   | 11.93   | 25.20   | 28.36   | 10.04   | 20.04   | 28.21   | 35.73   | 30.86   | 23.67   | 20.70   | 25.47   | 28.60   | 17.86   | 22.55   | 22.26   |
| PC ae C38:0 | 9.10    | 14.50   | 8.01    | 5.07    | 10.44   | 10.85   | 3.95    | 8.13    | 11.44   | 11.06   | 9.44    | 6.99    | 7.62    | 9.03    | 9.52    | 6.52    | 8.37    | 8.33    |
| PC ae C38:1 | 5.82    | 8.94    | 5.38    | 2.40    | 5.17    | 5.93    | 2.62    | 4.49    | 6.36    | 5.57    | 4.96    | 5.02    | 3.61    | 4.49    | 4.82    | 4.24    | 3.39    | 4.15    |
| PC ae C38:2 | 28.81   | 44.28   | 25.58   | 13.13   | 25.58   | 29.54   | 14.45   | 24.02   | 31.90   | 26.77   | 22.86   | 21.65   | 15.13   | 19.31   | 21.32   | 16.53   | 17.69   | 19.38   |
| PC ae C38:3 | 20.85   | 35.61   | 17.11   | 7.72    | 17.72   | 20.31   | 8.68    | 17.29   | 24.62   | 20.02   | 15.65   | 14.99   | 9.82    | 13.58   | 15.01   | 9.39    | 10.14   | 11.63   |
| PC ae C38:4 | 22.22   | 37.23   | 20.29   | 9.54    | 20.87   | 22.44   | 7.84    | 15.74   | 24.91   | 27.24   | 21.40   | 20.05   | 14.04   | 17.61   | 19.15   | 13.04   | 14.98   | 16.24   |
| PC ae C38:5 | 34.63   | 55.83   | 29.60   | 13.36   | 30.58   | 34.64   | 13.11   | 25.34   | 36.44   | 44.70   | 36.49   | 30.53   | 23.55   | 28.55   | 33.86   | 22.55   | 27.12   | 29.16   |
| PC ae C38:6 | 32.81   | 52.35   | 26.94   | 12.70   | 29.57   | 33.70   | 10.58   | 22.78   | 33.02   | 41.51   | 33.93   | 27.86   | 23.51   | 27.87   | 31.90   | 20.46   | 24.65   | 26.24   |
| PC ae C40:1 | 2.04    | 2.96    | 1.74    | 1.12    | 2.00    | 1.85    | 0.66    | 1.48    | 1.88    | 2.49    | 2.23    | 1.59    | 1.64    | 1.91    | 1.96    | 1.24    | 1.59    | 1.47    |
| PC ae C40:2 | 5.89    | 7.77    | 5.30    | 3.19    | 5.20    | 5.06    | 3.49    | 5.86    | 6.17    | 4.32    | 3.59    | 3.86    | 2.92    | 3.52    | 3.46    | 2.82    | 3.07    | 3.20    |
| PC ae C40:3 | 3.00    | 4.31    | 2.96    | 1.38    | 2.68    | 3.02    | 1.58    | 2.72    | 3.08    | 2.98    | 2.70    | 2.66    | 1.85    | 2.29    | 2.52    | 1.89    | 1.93    | 1.82    |
| PC ae C40:4 | 4.04    | 5.93    | 3.19    | 1.82    | 3.86    | 4.07    | 1.65    | 2.86    | 3.83    | 4.45    | 3.80    | 3.49    | 2.62    | 3.47    | 3.56    | 2.75    | 2.84    | 3.36    |
| PC ae C40:5 | 12.53   | 19.80   | 10.53   | 5.12    | 11.63   | 12.93   | 5.17    | 8.51    | 13.97   | 15.17   | 12.49   | 10.95   | 8.15    | 10.31   | 11.46   | 8.01    | 8.40    | 9.48    |
| PC ae C40:6 | 10.70   | 16.71   | 9.07    | 4.60    | 9.77    | 10.90   | 3.76    | 7.48    | 10.84   | 13.74   | 10.97   | 10.15   | 7.30    | 8.95    | 10.35   | 7.00    | 7.82    | 8.29    |
| PC ae C42:0 | 2.50    | 3.42    | 2.04    | 1.31    | 2.41    | 2.32    | 1.08    | 1.64    | 2.54    | 2.56    | 2.42    | 1.98    | 1.62    | 2.02    | 1.96    | 1.31    | 1.48    | 1.52    |
| PC ae C42:2 | 1.25    | 1.41    | 0.86    | 0.62    | 1.05    | 1.06    | 0.40    | 0.65    | 0.84    | 1.27    | 1.05    | 1.01    | 0.78    | 0.78    | 0.89    | 0.74    | 0.56    | 0.75    |
| PC ae C42:3 | 1.32    | 1.78    | 1.09    | 0.71    | 1.27    | 1.20    | 0.67    | 0.91    | 1.43    | 1.53    | 1.18    | 1.34    | 0.90    | 1.21    | 1.07    | 0.73    | 0.86    | 0.81    |
| PC ae C42:4 | 1.11    | 1.49    | 0.64    | 0.58    | 1.04    | 1.13    | 0.50    | 0.99    | 1.02    | 1.11    | 1.00    | 1.09    | 0.67    | 1.11    | 0.92    | 0.61    | 0.65    | 0.72    |
| PC ae C42:5 | 2.46    | 3.78    | 2.29    | 1.49    | 2.26    | 2.40    | 1.28    | 2.15    | 2.46    | 2.69    | 2.18    | 2.08    | 1.50    | 2.00    | 2.06    | 1.54    | 1.44    | 1.92    |
| PC ae C44:3 | 0.58    | 0.72    | 0.56    | 0.24    | 0.46    | 0.41    | 0.38    | 0.39    | 0.64    | 0.63    | 0.50    | 0.45    | 0.40    | 0.56    | 0.48    | 0.34    | 0.38    | 0.43    |
| PC ae C44:4 | 0.49    | 0.68    | 0.49    | 0.31    | 0.51    | 0.57    | 0.32    | 0.50    | 0.50    | 0.52    | 0.40    | 0.37    | 0.28    | 0.46    | 0.37    | 0.24    | 0.26    | 0.27    |
| PC ae C44:6 | 0.58    | 0.87    | 0.53    | 0.32    | 0.66    | 0.65    | 0.36    | 0.61    | 0.88    | 0.71    | 0.59    | 0.50    | 0.42    | 0.51    | 0.57    | 0.45    | 0.47    | 0.48    |
| Sugar       | 3453.91 | 2795.92 | 1790.71 | 4281.02 | 3038.59 | 2997.45 | 1805.38 | 2700.42 | 4305.21 | 2052.24 | 2023.16 | 2137.81 | 5304.41 | 3895.19 | 3755.51 | 3203.01 | 4279.05 | 3689.19 |
| Ala         | 271.00  | 270.67  | 189.33  | 353.33  | 380.00  | 386.67  | 810.00  | 1423.33 | 1520.00 | 793.33  | 693.33  | 109.67  | 1466.67 | 1123.33 | 1350.00 | 4166.67 | 4766.67 | 4466.67 |

|            |         |         |         |         |         |         |         |         |         |         |         |         |         |         |         |         |         |         |
|------------|---------|---------|---------|---------|---------|---------|---------|---------|---------|---------|---------|---------|---------|---------|---------|---------|---------|---------|
| Arg        | 114.00  | 98.00   | 70.00   | 147.67  | 126.00  | 107.67  | 179.67  | 228.67  | 269.33  | 111.67  | 113.00  | 92.33   | 167.00  | 165.33  | 132.00  | 300.00  | 293.67  | 298.00  |
| Asn        | 653.33  | 660.00  | 433.33  | 790.00  | 843.33  | 846.67  | 1350.00 | 1903.33 | 1856.67 | 703.33  | 550.00  | 326.33  | 980.00  | 886.67  | 1183.33 | 1993.33 | 2136.67 | 2083.33 |
| Asp        | 143.33  | 156.00  | 103.33  | 164.67  | 181.00  | 172.67  | 128.00  | 216.33  | 228.00  | 207.00  | 186.67  | 120.33  | 253.33  | 239.33  | 272.00  | 71.33   | 63.33   | 51.67   |
| Cit        | 4.63    | 4.23    | 3.33    | 4.67    | 5.50    | 5.90    | 10.07   | 19.23   | 20.20   | 3.90    | 3.17    | 3.00    | 7.10    | 6.00    | 6.73    | 22.27   | 21.23   | 22.20   |
| Gln        | 1056.67 | 1106.67 | 646.67  | 1136.67 | 1430.00 | 1076.67 | 1100.00 | 1680.00 | 1973.33 | 526.67  | 456.67  | 620.00  | 556.67  | 526.67  | 490.00  | 21.57   | 19.20   | 15.13   |
| Glu        | 3866.67 | 3866.67 | 2806.67 | 4133.33 | 5166.67 | 4833.33 | 2653.33 | 4800.00 | 4366.67 | 2866.67 | 2406.67 | 1220.00 | 3566.67 | 2810.00 | 3600.00 | 730.00  | 970.00  | 843.33  |
| Gly        | 546.67  | 540.00  | 327.00  | 543.33  | 616.67  | 536.67  | 550.00  | 913.33  | 1010.00 | 366.67  | 296.67  | 120.00  | 483.33  | 383.33  | 440.00  | 970.00  | 860.00  | 990.00  |
| His        | 35.00   | 33.67   | 20.63   | 41.33   | 44.00   | 36.67   | 70.67   | 114.33  | 131.00  | 33.23   | 29.73   | 16.70   | 53.67   | 43.67   | 45.00   | 142.33  | 132.67  | 155.33  |
| Ile        | 117.33  | 107.00  | 69.33   | 145.00  | 141.33  | 123.67  | 206.67  | 301.33  | 373.33  | 129.00  | 108.67  | 62.33   | 211.00  | 178.00  | 178.00  | 463.33  | 463.33  | 503.33  |
| Leu        | 109.33  | 99.67   | 59.67   | 136.33  | 135.67  | 119.00  | 242.67  | 304.33  | 366.67  | 119.33  | 102.00  | 82.67   | 217.33  | 183.67  | 174.00  | 446.67  | 393.33  | 453.33  |
| Lys        | 10.03   | 7.20    | 5.67    | 15.03   | 9.63    | 8.90    | 9.83    | 21.10   | 21.83   | 9.37    | 8.10    | 18.33   | 16.27   | 14.77   | 8.23    | 26.53   | 19.50   | 28.00   |
| Met        | 23.87   | 26.83   | 16.73   | 31.27   | 33.30   | 27.97   | 40.33   | 60.00   | 78.33   | 23.57   | 22.37   | 16.47   | 36.67   | 33.67   | 34.33   | 75.67   | 75.00   | 82.00   |
| Orn        | 5.23    | 4.27    | 3.05    | 10.83   | 8.43    | 6.47    | 13.70   | 31.27   | 32.13   | 5.63    | 4.80    | 3.28    | 11.70   | 10.63   | 7.83    | 46.67   | 31.80   | 43.00   |
| Phe        | 27.43   | 25.10   | 16.53   | 32.87   | 32.33   | 30.27   | 38.33   | 54.00   | 70.00   | 25.97   | 22.93   | 17.33   | 41.00   | 35.00   | 34.67   | 69.33   | 71.00   | 75.33   |
| Pro        | 275.00  | 278.67  | 173.33  | 309.33  | 353.33  | 291.33  | 523.33  | 580.00  | 616.67  | 270.33  | 244.67  | 103.67  | 380.00  | 363.33  | 370.00  | 570.00  | 503.33  | 566.67  |
| Ser        | 64.67   | 60.67   | 36.00   | 64.33   | 74.33   | 68.67   | 10.50   | 17.73   | 13.97   | 83.00   | 71.33   | 82.67   | 90.00   | 84.33   | 81.00   | 62.33   | 53.33   | 72.67   |
| Thr        | 90.67   | 90.67   | 58.67   | 117.00  | 119.67  | 130.67  | 195.33  | 312.33  | 325.00  | 102.33  | 80.33   | 50.33   | 154.33  | 126.33  | 154.67  | 350.00  | 436.67  | 390.00  |
| Trp        | 8.87    | 8.23    | 5.67    | 10.43   | 10.60   | 9.33    | 13.37   | 18.60   | 24.23   | 8.83    | 7.53    | 5.47    | 13.70   | 11.47   | 11.47   | 26.87   | 27.17   | 28.67   |
| Tyr        | 40.33   | 40.33   | 24.77   | 50.33   | 50.33   | 46.00   | 77.33   | 112.67  | 142.67  | 41.00   | 35.33   | 22.50   | 64.33   | 53.33   | 55.33   | 154.33  | 156.33  | 169.00  |
| Val        | 31.40   | 31.00   | 19.23   | 40.00   | 38.33   | 36.33   | 43.00   | 60.00   | 79.33   | 33.67   | 28.80   | 25.17   | 48.67   | 42.67   | 42.67   | 83.00   | 81.00   | 89.67   |
| Ac-Orn     | 1.16    | 1.06    | 0.82    | 1.63    | 1.59    | 1.37    | 3.47    | 7.83    | 9.13    | 1.40    | 1.08    | 0.39    | 2.17    | 1.77    | 1.91    | 16.30   | 8.50    | 12.37   |
| ADMA       | 0.17    | 0.07    | 0.11    | 0.17    | 0.19    | 0.18    | 0.35    | 0.54    | 0.65    | 0.11    | 0.19    | 0.12    | 0.26    | 0.61    | 0.24    | 0.85    | 0.97    | 0.54    |
| alpha-AAA  | 2.26    | 2.58    | 1.29    | 2.76    | 3.47    | 2.20    | 2.44    | 6.87    | 8.30    | 2.57    | 1.69    | 0.92    | 3.25    | 2.55    | 2.72    | 3.47    | 2.74    | 2.40    |
| Carnosine  | 0.56    | 0.53    | 0.32    | 0.66    | 0.49    | 0.50    | 0.35    | 0.52    | 0.81    | 0.25    | 0.33    | 0.36    | 0.68    | 0.57    | 0.38    | 0.34    | 0.52    | 0.44    |
| Met-SO     | 1.74    | 1.37    | 0.99    | 1.92    | 1.63    | 1.69    | 3.32    | 4.43    | 6.30    | 1.33    | 1.17    | 0.69    | 1.89    | 1.87    | 2.33    | 5.77    | 5.10    | 5.97    |
| Putrescine | 27.67   | 30.10   | 19.97   | 41.00   | 27.60   | 27.23   | 28.77   | 50.33   | 57.00   | 25.57   | 19.67   | 24.20   | 38.67   | 36.67   | 27.93   | 37.67   | 39.67   | 35.00   |
| Serotonin  | 0.13    | 0.15    | 0.09    | 0.20    | 0.19    | 0.17    | 0.09    | 0.12    | 0.16    | 0.08    | 0.05    | 0.12    | 0.11    | 0.07    | 0.06    | 0.09    | 0.11    | 0.09    |
| Spermidine | 6.57    | 6.57    | 5.13    | 7.33    | 4.90    | 8.50    | 10.40   | 11.67   | 10.40   | 6.43    | 4.27    | 3.47    | 9.37    | 8.40    | 7.43    | 10.40   | 11.27   | 9.33    |
| Spermine   | 3.33    | 4.10    | 3.57    | 5.13    | 3.43    | 7.57    | 9.70    | 8.87    | 6.50    | 3.26    | 2.39    | 1.35    | 5.83    | 4.23    | 4.73    | 6.63    | 8.33    | 5.63    |
| t4-OH-Pro  | 229.67  | 223.00  | 138.33  | 263.00  | 286.33  | 249.67  | 576.67  | 713.33  | 900.00  | 243.67  | 227.00  | 101.33  | 426.67  | 353.33  | 396.67  | 1093.33 | 1080.00 | 1180.00 |



|                 |        |        |        |        |        |        |        |        |        |        |        |        |        |        |        |        |        |        |
|-----------------|--------|--------|--------|--------|--------|--------|--------|--------|--------|--------|--------|--------|--------|--------|--------|--------|--------|--------|
| Taurine         | 204.67 | 202.00 | 158.67 | 222.33 | 229.33 | 218.67 | 188.33 | 221.33 | 217.00 | 216.33 | 204.67 | 119.33 | 267.33 | 251.33 | 257.00 | 259.33 | 254.33 | 234.33 |
| total DMA       | 0.17   | 0.14   | 0.09   | 0.22   | 0.21   | 0.18   | 0.38   | 0.72   | 0.81   | 0.15   | 0.12   | 0.09   | 0.32   | 0.25   | 0.22   | 0.71   | 1.01   | 0.88   |
| SM (OH) C14:1   | 1.49   | 2.06   | 1.20   | 0.93   | 1.82   | 1.54   | 0.89   | 1.37   | 2.17   | 2.16   | 1.89   | 1.69   | 1.61   | 2.05   | 2.14   | 1.57   | 1.76   | 1.90   |
| SM (OH) C16:1   | 0.23   | 0.37   | 0.19   | 0.20   | 0.39   | 0.27   | 0.13   | 0.22   | 0.32   | 0.39   | 0.36   | 0.28   | 0.28   | 0.25   | 0.41   | 0.28   | 0.27   | 0.23   |
| SM (OH) C22:1   | 0.10   | 0.11   | 0.03   | 0.02   | 0.09   | 0.02   | 0.03   | 0.07   | 0.18   | 0.20   | 0.14   | 0.10   | 0.09   | 0.11   | 0.10   | 0.16   | 0.13   | 0.13   |
| SM (OH) C22:2   | 0.01   | 0.05   | 0.02   | 0.05   | 0.03   | 0.03   | 0.02   | 0.02   | 0.00   | 0.07   | 0.12   | 0.12   | 0.12   | 0.12   | 0.10   | 0.14   | 0.14   | 0.17   |
| SM C16:0        | 22.36  | 32.34  | 17.10  | 12.78  | 23.96  | 22.24  | 11.07  | 17.89  | 28.04  | 24.50  | 20.69  | 19.30  | 16.75  | 19.78  | 22.81  | 15.35  | 17.32  | 19.54  |
| SM C16:1        | 3.11   | 4.78   | 2.83   | 2.28   | 3.90   | 3.55   | 1.69   | 3.00   | 5.16   | 4.27   | 3.84   | 3.13   | 3.47   | 4.15   | 4.39   | 3.25   | 3.60   | 3.80   |
| SM C18:0        | 0.30   | 0.44   | 0.20   | 0.17   | 0.19   | 0.34   | 0.06   | 0.03   | 0.08   | 0.27   | 0.35   | 0.38   | 0.17   | 0.05   | 0.17   | 0.05   | 0.05   | 0.05   |
| SM C18:1        | 0.52   | 0.82   | 0.45   | 0.39   | 0.63   | 0.56   | 0.33   | 0.58   | 0.88   | 0.75   | 0.64   | 0.75   | 0.61   | 0.77   | 0.66   | 0.64   | 0.72   | 0.76   |
| SM C20:2        | 0.14   | 0.28   | 0.10   | 0.10   | 0.18   | 0.14   | 0.07   | 0.16   | 0.31   | 0.20   | 0.14   | 0.22   | 0.13   | 0.22   | 0.10   | 0.16   | 0.25   | 0.23   |
| SM C22:3        | 0.06   | 0.10   | 0.06   | 0.08   | 0.03   | 0.08   | 0.04   | 0.02   | 0.14   | 0.06   | 0.05   | 0.10   | 0.06   | 0.17   | 0.00   | 0.14   | 0.08   | 0.11   |
| SM C24:0        | 1.37   | 2.29   | 1.09   | 0.80   | 1.38   | 1.39   | 0.88   | 1.28   | 2.31   | 1.99   | 1.51   | 1.99   | 1.32   | 1.67   | 1.60   | 1.65   | 1.72   | 2.06   |
| SM C24:1        | 0.44   | 0.54   | 0.37   | 0.36   | 0.43   | 0.44   | 0.36   | 0.43   | 0.65   | 0.70   | 0.59   | 0.77   | 0.51   | 0.71   | 0.57   | 0.79   | 0.77   | 0.96   |
| SM C26:0        | 0.03   | 0.05   | 0.02   | 0.02   | 0.02   | 0.02   | 0.01   | 0.02   | 0.02   | 0.04   | 0.01   | 0.03   | 0.02   | 0.01   | 0.01   | 0.03   | 0.05   | 0.03   |
| SM C26:1        | 0.05   | 0.07   | 0.03   | 0.05   | 0.06   | 0.04   | 0.03   | 0.04   | 0.09   | 0.07   | 0.03   | 0.08   | 0.05   | 0.06   | 0.05   | 0.07   | 0.09   | 0.06   |
| C0              | 6.59   | 7.04   | 4.22   | 6.63   | 7.47   | 6.53   | 6.22   | 7.44   | 10.10  | 14.44  | 12.70  | 9.15   | 23.46  | 18.46  | 20.18  | 22.50  | 23.29  | 21.81  |
| C18:1           | 0.09   | 0.08   | 0.05   | 0.10   | 0.10   | 0.10   | 0.04   | 0.05   | 0.05   | 0.09   | 0.08   | 0.16   | 0.12   | 0.11   | 0.12   | 0.08   | 0.10   | 0.09   |
| C2              | 2.88   | 2.76   | 1.69   | 3.51   | 3.70   | 3.13   | 4.17   | 5.52   | 6.59   | 2.86   | 2.77   | 1.19   | 5.13   | 4.53   | 4.68   | 15.98  | 17.66  | 18.38  |
| C3              | 0.51   | 0.49   | 0.32   | 0.58   | 0.57   | 0.53   | 0.46   | 0.69   | 0.90   | 0.87   | 0.75   | 0.29   | 1.37   | 1.23   | 1.32   | 1.83   | 2.00   | 1.73   |
| C3-DC-M / C5-OH | 0.04   | 0.04   | 0.03   | 0.04   | 0.04   | 0.03   | 0.03   | 0.05   | 0.05   | 0.04   | 0.04   | 0.03   | 0.06   | 0.05   | 0.05   | 0.07   | 0.07   | 0.07   |
| C4              | 3.38   | 3.20   | 1.89   | 3.67   | 3.68   | 3.34   | 3.43   | 4.94   | 6.54   | 6.83   | 6.08   | 2.98   | 11.25  | 9.06   | 9.57   | 12.39  | 12.90  | 12.43  |
| C5              | 12.07  | 11.62  | 7.29   | 12.72  | 12.98  | 12.26  | 9.58   | 12.53  | 16.48  | 15.25  | 13.10  | 7.22   | 29.19  | 23.14  | 25.93  | 37.32  | 41.86  | 39.99  |

**Supplementary Table S2.** Micromolar concentrations of quantified metabolites in the xenograft tumor models harboring G12C or WT KRAS isoforms. R# number of biological replicates

| Metabolites    | WT    |       |       |       | G12C  |       |       |       |
|----------------|-------|-------|-------|-------|-------|-------|-------|-------|
|                | R1    | R2    | R3    | R4    | R1    | R2    | R3    | R4    |
| lysoPC a C16:0 | 0.333 | 0.347 | 0.255 | 0.682 | 1.47  | 0.667 | 1.21  | 0.883 |
| lysoPC a C18:1 | 0.18  | 0.196 | 0.087 | 0.323 | 0.566 | 0.221 | 0.407 | 0.333 |
| lysoPC a C18:2 | 0.193 | 0.216 | 0.123 | 0.488 | 0.663 | 0.359 | 0.575 | 0.492 |
| lysoPC a C20:4 | 0.026 | 0.096 | 0.032 | 0.105 | 0.192 | 0.064 | 0.12  | 0.069 |
| PC aa C32:0    | 0.53  | 0.184 | 0.382 | 0.082 | 0.599 | 1.06  | 0.174 | 0.135 |
| PC aa C32:1    | 0.554 | 0.196 | 0.254 | 0.131 | 0.349 | 0.456 | 0.111 | 0.086 |
| PC aa C34:1    | 2.19  | 0.772 | 1.29  | 0.251 | 1.47  | 2.86  | 0.372 | 0.342 |
| PC aa C34:2    | 0.923 | 0.315 | 0.495 | 0.258 | 0.731 | 1.57  | 0.32  | 0.235 |
| PC aa C36:1    | 0.297 | 0.144 | 0.224 | 0.049 | 0.2   | 0.442 | 0.057 | 0.056 |
| PC aa C36:2    | 0.884 | 0.247 | 0.498 | 0.128 | 0.453 | 1.31  | 0.151 | 0.164 |
| PC aa C36:3    | 0.377 | 0.14  | 0.226 | 0.16  | 0.331 | 0.687 | 0.155 | 0.112 |
| PC aa C36:4    | 0.129 | 0.047 | 0.102 | 0.074 | 0.154 | 0.349 | 0.12  | 0.084 |
| PC aa C38:3    | 0.098 | 0.037 | 0.082 | 0.015 | 0.063 | 0.187 | 0.028 | 0.021 |
| PC aa C38:4    | 0.097 | 0.038 | 0.096 | 0.042 | 0.1   | 0.297 | 0.047 | 0.036 |
| PC ae C34:2    | 0.119 | 0.044 | 0.08  | 0.026 | 0.052 | 0.162 | 0.021 | 0.019 |
| sugars         | 95.9  | 17.4  | 88.7  | 101   | 74.7  | 49.4  | 41.6  | 112   |
| Ala            | 550   | 314   | 231   | 317   | 523   | 463   | 560   | 600   |
| Arg            | 29.9  | 14.5  | 19.6  | 19    | 22.8  | 20.5  | 27.7  | 21.8  |
| Asn            | 60.7  | 48    | 40    | 63    | 42.3  | 56.7  | 47.3  | 55.7  |
| Asp            | 79    | 46    | 37    | 79    | 49.3  | 45    | 69    | 75.7  |
| Cit            | 45    | 40    | 34.7  | 35.3  | 30.5  | 29.8  | 37    | 37    |
| Gln            | 203   | 92.7  | 115   | 133   | 62    | 106   | 81.3  | 96.3  |
| Glu            | 1013  | 843   | 597   | 793   | 593   | 540   | 580   | 703   |
| Gly            | 617   | 322   | 255   | 423   | 353   | 470   | 470   | 306   |
| His            | 49.7  | 32.2  | 28.9  | 42    | 39.3  | 38.7  | 46.7  | 39.7  |
| Ile            | 41.7  | 20.1  | 18.8  | 28.2  | 32.9  | 32.1  | 34.7  | 35.3  |
| Leu            | 98.7  | 46.7  | 49    | 67.3  | 75    | 68    | 80.7  | 87.3  |
| Lys            | 84.3  | 62    | 65.3  | 58.7  | 72.7  | 76.7  | 107   | 58.7  |
| Met            | 59.3  | 30.3  | 28.5  | 40.3  | 43.7  | 34    | 49.7  | 53    |
| Orn            | 11.5  | 9.6   | 9.37  | 10.4  | 11.2  | 21.4  | 22.4  | 13.2  |
| Phe            | 56    | 26.8  | 31.9  | 37.7  | 45.7  | 43    | 53    | 51.7  |
| Pro            | 224   | 131   | 130   | 149   | 178   | 143   | 171   | 180   |
| Ser            | 63.3  | 37.3  | 29.9  | 38.3  | 41.7  | 38    | 70.3  | 57.7  |
| Thr            | 176   | 152   | 127   | 155   | 168   | 204   | 191   | 173   |
| Trp            | 13.7  | 8.53  | 9.67  | 12.3  | 14.7  | 14.8  | 18.8  | 14.8  |
| Tyr            | 72.3  | 27.7  | 35.3  | 47.7  | 48    | 52    | 52.7  | 66    |
| Val            | 70.7  | 50.3  | 40.3  | 69    | 75    | 66.7  | 93.7  | 69.7  |
| Ac-Orn         | 2.62  | 1.41  | 1.68  | 1.79  | 1.5   | 1.14  | 2.02  | 1.56  |
| ADMA           | 0.66  | 0.367 | 0.353 | 0.297 | 0.483 | 0.757 | 0.723 | 1.15  |
| alpha-AAA      | 2.66  | 1.4   | 1.22  | 3.09  | 1.83  | 3.17  | 1.96  | 1.53  |
| Carnosine      | 0.245 | 0.05  | 0.049 | 0.05  | 0.05  | 0.057 | 0.054 | 0.082 |
| Creatinine     | 2.5   | 2.32  | 2.41  | 2.58  | 2.69  | 2.61  | 2.53  | 2.75  |
| DOPA           | 0.184 | 0.114 | 0.133 | 0.151 | 0.157 | 0.204 | 0.238 | 0.222 |

|               |       |       |       |       |       |       |       |       |
|---------------|-------|-------|-------|-------|-------|-------|-------|-------|
| Histamine     | 0.557 | 0.311 | 1.07  | 2.86  | 0.693 | 1.52  | 0.45  | 1.61  |
| Kynurenine    | 0.52  | 0.279 | 0.329 | 0.423 | 0.186 | 0.287 | 0.312 | 0.264 |
| Met-SO        | 2.21  | 1.22  | 0.947 | 1.84  | 1.32  | 0.997 | 1.9   | 1.44  |
| Putrescine    | 3.67  | 2.73  | 2.73  | 2.34  | 4.73  | 4.63  | 3.73  | 3.27  |
| Serotonin     | 0.023 | 0.019 | 0.024 | 0.061 | 0.028 | 0.049 | 0.023 | 0.028 |
| Spermidine    | 15.5  | 9.8   | 12.8  | 11.8  | 14.2  | 9.53  | 13.2  | 11.6  |
| Spermine      | 4.33  | 3.37  | 3.53  | 3.67  | 3.9   | 3.27  | 3.37  | 3.25  |
| t4-OH-Pro     | 16    | 10.3  | 8.97  | 11.7  | 15.2  | 12.7  | 12.3  | 12.1  |
| Taurine       | 160   | 159   | 160   | 138   | 244   | 209   | 220   | 186   |
| total DMA     | 0.487 | 0.333 | 0.347 | 0.41  | 0.35  | 0.477 | 0.593 | 0.507 |
| SM C16:0      | 0.369 | 0.126 | 0.21  | 0.085 | 0.255 | 0.494 | 0.101 | 0.088 |
| SM C24:1      | 0.043 | 0.016 | 0.029 | 0.013 | 0.034 | 0.057 | 0.02  | 0.02  |
| C0            | 3.19  | 2.6   | 3.88  | 3.39  | 9.75  | 6.69  | 8.12  | 7.19  |
| C16           | 0.06  | 0.066 | 0.067 | 0.09  | 0.289 | 0.137 | 0.162 | 0.147 |
| C16:1         | 0.035 | 0.026 | 0.025 | 0.036 | 0.107 | 0.06  | 0.053 | 0.044 |
| C18:1         | 0.092 | 0.076 | 0.052 | 0.133 | 0.354 | 0.176 | 0.194 | 0.19  |
| C18:2         | 0.02  | 0.024 | 0.019 | 0.039 | 0.152 | 0.109 | 0.098 | 0.098 |
| C2            | 3.54  | 2.47  | 3.04  | 2.83  | 9.44  | 7.48  | 8.01  | 6.8   |
| C3            | 0.072 | 0.072 | 0.066 | 0.079 | 0.178 | 0.15  | 0.2   | 0.162 |
| C4            | 0.388 | 0.355 | 0.356 | 0.304 | 1.15  | 0.964 | 1.49  | 0.866 |
| C3-DC (C4-OH) | 0.07  | 0.05  | 0.067 | 0.049 | 0.115 | 0.101 | 0.104 | 0.087 |
| C5            | 0.146 | 0.101 | 0.123 | 0.131 | 0.351 | 0.325 | 0.465 | 0.308 |

**Supplementary Table S3.** Metabolite concentrations (uM) and relative difference in abundance as fold change in the discriminant (from S-plots generated by OPLS-DA) metabolite between G12C and WT KRAS isoforms on monolayer cell system. R# number of biological replicates

| Metabolites | WT      |         |         |         |         |         |         |         |         | G12C    |         |         |         |         |         |         |         |         | Fold change<br>G12C vs WT |
|-------------|---------|---------|---------|---------|---------|---------|---------|---------|---------|---------|---------|---------|---------|---------|---------|---------|---------|---------|---------------------------|
|             | R1      | R2      | R3      | R4      | R5      | R6      | R7      | R8      | R9      | R1      | R2      | R3      | R4      | R5      | R6      | R7      | R8      | R9      |                           |
| Sugar       | 3453.91 | 2795.92 | 1790.71 | 4281.02 | 3038.59 | 2997.45 | 1805.38 | 2700.42 | 4305.21 | 2052.24 | 2023.16 | 2137.81 | 5304.41 | 3895.19 | 3755.51 | 3203.01 | 4279.05 | 3689.19 | 1.12                      |
| Ala         | 271.00  | 270.67  | 189.33  | 353.33  | 380.00  | 386.67  | 810.00  | 1423.33 | 1520.00 | 793.33  | 693.33  | 109.67  | 1466.67 | 1123.33 | 1350.00 | 4166.67 | 4766.67 | 4466.67 | 3.38                      |
| Asn         | 653.33  | 660.00  | 433.33  | 790.00  | 843.33  | 846.67  | 1350.00 | 1903.33 | 1856.67 | 703.33  | 550.00  | 326.33  | 980.00  | 886.67  | 1183.33 | 1993.33 | 2136.67 | 2083.33 | 1.16                      |
| Gln         | 1056.67 | 1106.67 | 646.67  | 1136.67 | 1430.00 | 1076.67 | 1100.00 | 1680.00 | 1973.33 | 526.67  | 456.67  | 620.00  | 556.67  | 526.67  | 490.00  | 21.57   | 19.20   | 15.13   | -3.47                     |
| Glu         | 3866.67 | 3866.67 | 2806.67 | 4133.33 | 5166.67 | 4833.33 | 2653.33 | 4800.00 | 4366.67 | 2866.67 | 2406.67 | 1220.00 | 3566.67 | 2810.00 | 3600.00 | 730.00  | 970.00  | 843.33  | -1.92                     |
| Gly         | 546.67  | 540.00  | 327.00  | 543.33  | 616.67  | 536.67  | 550.00  | 913.33  | 1010.00 | 366.67  | 296.67  | 120.00  | 483.33  | 383.33  | 440.00  | 970.00  | 860.00  | 990.00  | -1.14                     |
| Ile         | 117.33  | 107.00  | 69.33   | 145.00  | 141.33  | 123.67  | 206.67  | 301.33  | 373.33  | 129.00  | 108.67  | 62.33   | 211.00  | 178.00  | 178.00  | 463.33  | 463.33  | 503.33  | 1.45                      |
| Leu         | 109.33  | 99.67   | 59.67   | 136.33  | 135.67  | 119.00  | 242.67  | 304.33  | 366.67  | 119.33  | 102.00  | 82.67   | 217.33  | 183.67  | 174.00  | 446.67  | 393.33  | 453.33  | 1.38                      |
| Ser         | 64.67   | 60.67   | 36.00   | 64.33   | 74.33   | 68.67   | 10.50   | 17.73   | 13.97   | 83.00   | 71.33   | 82.67   | 90.00   | 84.33   | 81.00   | 62.33   | 53.33   | 72.67   | 1.66                      |
| Spermidine  | 6.57    | 6.57    | 5.13    | 7.33    | 4.90    | 8.50    | 10.40   | 11.67   | 10.40   | 6.43    | 4.27    | 3.47    | 9.37    | 8.40    | 7.43    | 10.40   | 11.27   | 9.33    | -1.02                     |
| t4-OH-Pro   | 229.67  | 223.00  | 138.33  | 263.00  | 286.33  | 249.67  | 576.67  | 713.33  | 900.00  | 243.67  | 227.00  | 101.33  | 426.67  | 353.33  | 396.67  | 1093.33 | 1080.00 | 1180.00 | 1.43                      |
| Taurine     | 204.67  | 202.00  | 158.67  | 222.33  | 229.33  | 218.67  | 188.33  | 221.33  | 217.00  | 216.33  | 204.67  | 119.33  | 267.33  | 251.33  | 257.00  | 259.33  | 254.33  | 234.33  | 1.11                      |
| C0          | 6.59    | 7.04    | 4.22    | 6.63    | 7.47    | 6.53    | 6.22    | 7.44    | 10.10   | 14.44   | 12.70   | 9.15    | 23.46   | 18.46   | 20.18   | 22.50   | 23.29   | 21.81   | 2.67                      |
| C5          | 12.07   | 11.62   | 7.29    | 12.72   | 12.98   | 12.26   | 9.58    | 12.53   | 16.48   | 15.25   | 13.10   | 7.22    | 29.19   | 23.14   | 25.93   | 37.32   | 41.86   | 39.99   | 2.17                      |
| PC aa C32:0 | 134.84  | 181.53  | 105.09  | 51.56   | 105.07  | 115.46  | 66.88   | 111.75  | 129.60  | 124.10  | 104.89  | 77.96   | 61.02   | 78.78   | 89.70   | 68.81   | 71.06   | 77.84   | -1.33                     |
| PC aa C32:1 | 1212.67 | 1729.86 | 1037.92 | 527.04  | 1188.41 | 1274.96 | 634.76  | 1218.41 | 1597.02 | 1178.40 | 1058.83 | 796.41  | 772.73  | 941.13  | 1073.20 | 779.58  | 914.56  | 974.06  | -1.23                     |
| PC aa C34:1 | 2590.89 | 3280.84 | 1991.96 | 1041.31 | 2257.43 | 2346.00 | 1182.90 | 2162.59 | 2811.60 | 1732.02 | 1472.37 | 1410.90 | 1106.49 | 1380.30 | 1531.45 | 1074.04 | 1203.25 | 1255.24 | -1.62                     |
| PC aa C34:2 | 895.25  | 1357.15 | 760.92  | 387.52  | 842.86  | 932.75  | 454.38  | 950.86  | 1286.91 | 866.89  | 792.54  | 595.05  | 576.36  | 711.37  | 757.13  | 643.82  | 768.84  | 813.88  | -1.21                     |
| PC aa C36:1 | 167.44  | 257.67  | 140.54  | 67.90   | 134.00  | 159.41  | 60.50   | 112.83  | 134.68  | 148.39  | 111.26  | 112.14  | 72.19   | 85.96   | 104.63  | 56.88   | 57.96   | 73.24   | -1.50                     |
| PC aa C36:2 | 1293.36 | 1961.16 | 1104.45 | 498.09  | 1104.33 | 1265.52 | 598.87  | 1077.50 | 1684.75 | 992.03  | 860.27  | 722.50  | 539.59  | 703.18  | 774.72  | 574.99  | 683.49  | 729.15  | -1.61                     |
| PC aa C36:3 | 189.48  | 297.10  | 158.58  | 78.45   | 178.66  | 194.90  | 77.14   | 164.84  | 233.97  | 202.95  | 167.66  | 139.76  | 112.51  | 140.33  | 151.77  | 102.36  | 124.23  | 128.94  | -1.24                     |
| PC ae C34:1 | 453.40  | 662.23  | 374.08  | 170.96  | 363.86  | 431.20  | 211.74  | 389.27  | 533.38  | 419.26  | 365.18  | 299.45  | 232.72  | 281.55  | 321.64  | 253.57  | 291.30  | 306.12  | -1.30                     |
| PC ae C34:2 | 182.06  | 269.49  | 150.77  | 75.69   | 151.28  | 174.19  | 80.55   | 149.08  | 199.30  | 165.66  | 139.14  | 112.66  | 96.56   | 114.55  | 131.18  | 98.61   | 117.69  | 126.21  | -1.30                     |
| PC ae C36:1 | 94.13   | 138.17  | 79.35   | 39.22   | 81.65   | 89.92   | 43.42   | 72.06   | 94.59   | 90.60   | 74.38   | 63.57   | 48.00   | 59.91   | 69.54   | 47.94   | 53.23   | 56.98   | -1.30                     |
| PC ae C36:2 | 178.93  | 262.83  | 145.60  | 70.97   | 155.18  | 173.76  | 78.79   | 143.75  | 212.80  | 160.17  | 136.69  | 118.04  | 92.07   | 115.11  | 125.28  | 92.28   | 107.70  | 118.49  | -1.33                     |
| PC ae C36:3 | 71.64   | 116.22  | 59.72   | 29.68   | 63.99   | 71.60   | 31.43   | 67.68   | 103.73  | 68.79   | 56.00   | 49.95   | 37.37   | 48.70   | 52.83   | 36.91   | 46.57   | 47.54   | -1.38                     |

**Supplementary Table S4.** Metabolite concentrations (uM) and relative difference in abundance as fold change in the discriminant (from S-plots generated by OPLS-DA) metabolites between G12C and WT KRAS isoforms on monolayer cell-derived xenograft tumors. R# number of biological replicates

| Metabolites | WT    |       |       |       | G12C |       |      |       | Fold change<br>G12C vs WT |
|-------------|-------|-------|-------|-------|------|-------|------|-------|---------------------------|
|             | R1    | R2    | R3    | R4    | R1   | R2    | R3   | R4    |                           |
| sugars      | 95.9  | 17.4  | 88.7  | 101   | 74.7 | 49.4  | 41.6 | 112   | -1.09                     |
| Ala         | 550   | 314   | 231   | 317   | 523  | 463   | 560  | 600   | 1.52                      |
| Asp         | 79    | 46    | 37    | 79    | 49.3 | 45    | 69   | 75.7  | -1.01                     |
| Gln         | 203   | 92.7  | 115   | 133   | 62   | 106   | 81.3 | 96.3  | -1.57                     |
| Glu         | 1013  | 843   | 597   | 793   | 593  | 540   | 580  | 703   | -1.34                     |
| His         | 49.7  | 32.2  | 28.9  | 42    | 39.3 | 38.7  | 46.7 | 39.7  | 1.08                      |
| Ile         | 41.7  | 20.1  | 18.8  | 28.2  | 32.9 | 32.1  | 34.7 | 35.3  | 1.24                      |
| Leu         | 98.7  | 46.7  | 49    | 67.3  | 75   | 68    | 80.7 | 87.3  | 1.19                      |
| Lys         | 84.3  | 62    | 65.3  | 58.7  | 72.7 | 76.7  | 107  | 58.7  | 1.17                      |
| Met         | 59.3  | 30.3  | 28.5  | 40.3  | 43.7 | 34    | 49.7 | 53    | 1.14                      |
| Orn         | 11.5  | 9.6   | 9.37  | 10.4  | 11.2 | 21.4  | 22.4 | 13.2  | 1.67                      |
| Phe         | 56    | 26.8  | 31.9  | 37.7  | 45.7 | 43    | 53   | 51.7  | 1.27                      |
| Pro         | 224   | 131   | 130   | 149   | 178  | 143   | 171  | 180   | 1.06                      |
| Ser         | 63.3  | 37.3  | 29.9  | 38.3  | 41.7 | 38    | 70.3 | 57.7  | 1.23                      |
| Thr         | 176   | 152   | 127   | 155   | 168  | 204   | 191  | 173   | 1.21                      |
| Trp         | 13.7  | 8.53  | 9.67  | 12.3  | 14.7 | 14.8  | 18.8 | 14.8  | 1.43                      |
| Tyr         | 72.3  | 27.7  | 35.3  | 47.7  | 48   | 52    | 52.7 | 66    | 1.20                      |
| Val         | 70.7  | 50.3  | 40.3  | 69    | 75   | 66.7  | 93.7 | 69.7  | 1.32                      |
| Putrescine  | 3.67  | 2.73  | 2.73  | 2.34  | 4.73 | 4.63  | 3.73 | 3.27  | 1.43                      |
| Taurine     | 160   | 159   | 160   | 138   | 244  | 209   | 220  | 186   | 1.39                      |
| C0          | 3.19  | 2.6   | 3.88  | 3.39  | 9.75 | 6.69  | 8.12 | 7.19  | 2.43                      |
| C2          | 3.54  | 2.47  | 3.04  | 2.83  | 9.44 | 7.48  | 8.01 | 6.8   | 2.67                      |
| C4          | 0.388 | 0.355 | 0.356 | 0.304 | 1.15 | 0.964 | 1.49 | 0.866 | 3.19                      |

**Supplementary Table S5.** List of the measurable metabolites using the Biocrates Absolute IDQ p180 kit

| METABOLITE CLASS                      | NUMBER | METABOLITE NAME OR ABBREVIATION                                                                                                                                                                                                                                                     | BIOLOGICAL RELEVANCE<br>(SELECTED EXAMPLES)                                                                                                       |
|---------------------------------------|--------|-------------------------------------------------------------------------------------------------------------------------------------------------------------------------------------------------------------------------------------------------------------------------------------|---------------------------------------------------------------------------------------------------------------------------------------------------|
| <b>AMINO ACIDS</b>                    | 21     | Alanine, arginine, aspartate, citrulline, glutamine, glutamate, glycine, histidine, isoleucine, leucine, lysine, methionine, ornithine, phenylalanine, proline, serine, threonine, tryptophan, tyrosine, valine                                                                     | Amino acid metabolism, urea cycle, activity of gluconeogenesis and glycolysis, insulin sensitivity, neurotransmitter metabolism, oxidative stress |
| <b>CARNITINE</b>                      | 1      | C0                                                                                                                                                                                                                                                                                  |                                                                                                                                                   |
| <b>ACYLCARNITINE</b>                  | 39     | C2, C3, C3:1, C3-OH, C4, C4:1, C4-OH, C5, C5:1, C5:1-DC, C5-DC, C5-M-DC, C5-OH, C6, C6:1, C7-DC, C8, C9, C10, C10:1, C10:2, C12, C12-DC, C14, C14:1, C14:1-OH, C14:2, C14:2-OH, C16, C16:1, C16:1-OH, C16:2, C16:2-OH, C16-OH, C18, C18:1, C18:1-OH, C18:2                          | Energy metabolism, fatty acid transport and mitochondrial fatty acid oxidation, ketosis, oxidative stress, mitochondrial membrane damage          |
| <b>BIOGENIC AMINES</b>                | 19     | Acetylornithine, asymmetric dimethylarginine, total dimethylarginine, alpha-amino adipic acid, carnosine, creatinine, histamine, kynurenine, methionine sulfoxide, nitrotyrosine, hydroxyproline, phenylethylamine, putrescine, sarcosine, serotonin, spermidine, spermine, taurine | Neurological disorders, cell proliferation, cell cycle progression, DNA stability, oxidative stress                                               |
| <b>LYSO-PHOSPHATIDYLCHOLINES</b>      | 14     | lysoPC a<br>C14:0/C16:0/C16:1/C17:0/C18:0/C18:1/C18:2/C20:3/C20:4/C26:0/C26:1/C28:0/C28:1                                                                                                                                                                                           | Degradation of phospholipids, membrane damage, signaling cascades, fatty acid profile                                                             |
| <b>DIACYL-PHOSPHATIDYLCHOLINES</b>    | 38     | PC aa<br>C24:0/C26:0/C28:1/C30:0/C30:2/C32:0/C32:1/C32:2/C32:3/C34:1/C32:2/C34:3/C32:4/C36:0/C36:1/C36:2/C36:3/C36:4/C36:5/C36:6/C38:0/C38:1/C38:3/C38:4/C38:5/C38:6/C40:1/C40:2/C40:3/C40:4/C40:5/C40:6/C42:0/C42:1/C42:2/C42:4/C42:5/C42:6                                        | Dyslipidemia, membrane composition and damage, fatty acid profile, activity of desaturases                                                        |
| <b>ACYL-ALKYL-PHOSPHATIDYLCHOLINE</b> | 38     | PC ae<br>C30:0/C30:2/C32:1/C32:2/C34:0/C34:1/C34:2/C34:3/C36:0/C36:1/C36:2/C36:3/C36:4/C36:5/C38:0/C38:1/C38:2/C38:3/C38:4/C38:5/C38:6/C40:1/C40:2/C40:3/C40:4/C40:5/C40:6/C42:0/C42:1/C42:2/C42:3/C42:4/C42:5/C44:3/C44:4/C44:5/C44:6                                              | Dyslipidemia, membrane composition and damage, fatty acid profile, activity of desaturases                                                        |
| <b>SPHINGOMYELINS</b>                 | 15     | SM (OH) C14:1, SM C16:0, SM C16:1, SM C16:1, SM C18:0, SM C18:1, SM C20:2, SM C22:3, SM (OH) C22:1, SM (OH) C22:2, SM C24:0, SM C24:1, SM (OH) C24:1, SM C26:0, SM C26:1                                                                                                            | Signaling cascades, membrane damage (eg. neurodegeneration)                                                                                       |
| <b>HEXOSE</b>                         | 1      | H1                                                                                                                                                                                                                                                                                  | Carbohydrate metabolism                                                                                                                           |
| <b>TOTAL</b>                          | 186    |                                                                                                                                                                                                                                                                                     |                                                                                                                                                   |

Aa, acyl-acyl; ae, acyl-alkyl; a, lyso; Cx:y, where x is the number of carbons in the fatty acid side chain; y is the number of double bonds in the fatty acid side chain; DC, decarboxyl; M methyl; OH, hydroxyl; PC, phosphatidylcholine; SM, sphingomyeline
